# Supplementary material for: Analysis of Epitopes on Dengue Virus Envelope Protein Recognized by Monoclonal Antibodies and Polyclonal Human Sera by a High Throughput Assay
Source: PLoS Negl Trop Dis. 2012 Jan 3;6(1):e1447. doi: 10.1371/journal.pntd.0001447 (PMC3250511; doi:10.1371/journal.pntd.0001447)
Supplement: Table S1 — Comparison of epitopes, neutralization potency and immunization protocol of CR/sCR and TS mAbs recognizing domain III of DENV E protein. (DOC) [file pntd.0001447.s005.doc]

**Table S1.** Comparison of epitopes, neutralization potency and immunization protocol of

CR/sCR and TS mAbs recognizing domain III of DENV E protein.

| Immunization of BALB/c mice* | | | | |  | Immunization of IFN-α/β R -/- C57BL/6 mice** | | | | |
| --- | --- | --- | --- | --- | --- | --- | --- | --- | --- | --- |
| mAbs | Class† | Epitope‡ | PRNT50§ | Ref. |  | mAbs | Class† | Epitope‡ | PRNT50§ | Ref. |
| DENV1 as immunogen: | | | | |  | DENV1 as immunogen: | | | | |
| DEN1-2 | sCR | 300, 301, 303, 329, 383 | 1250 |  |  | E102 | CR | 299, 300, 301, 328, 330, 332, 334, (324) | 1.1 | [33] |
| DA6-7 | TS | 307, 310, 389, 391, (312) | 1250 | [39] |  | E90 | sCR | 300, 328, 332, (303, 307, 309) | 1.9 | [33] |
| DEN1-3 | TS | 300, 301, 303, 329, 383 (83, 385) | 780 |  |  | E98 | sCR | 375, 390, (301, 310) | 13 | [33] |
|  | | | | |  | E99 | sCR | 309, 310, 311, (307) | 11 | [33] |
| DENV2 as immunogen: | | | | |  |  |  |  |  |  |
| 5A2-7 | CR | 317, (304, 310, 315, 383) | >105 | [32] |  | E106 | sCR | 310, 328, 329, 330, 361, 362, 364,  385, (332, 384) | 0.6 | [33] |
| 13D4-1 | CR | 317, (310, 359) | >105 | [32] |  | E113 | sCR | 299, 300, 301, 310, 328, 332, 334, (356) | 1.3 | [33] |
| 9D12 | sCR | 304, 305, 307, 310, 384, (303, 329, 390) | 2000 | [32] |  | E100 | TS | 307, 329, 330, 361, 362, (300, 301, 310, 324, 332, 370, 393) | 24 | [33] |
| 1A1D-2 | sCR | 304, 305, 307, 310, (384) | 300 | [32] |  | E95 | TS | 390, 391 | 14 | [33] |
| 1F1 | TS | 303, 304, 330, 383, 384, (307, 310, 327, 329) | 10 | [32] |  | E101 | TS | 303, 328, 329, 330, 332 | 0.8 | [33] |
| 3H5-1 | TS  TS | 304, 383, 384, (307, 310, 327, 329)  305, 384, (329, 332) | 180 | [32]  [29] |  | E103 | TS | 303, 328, 329, 330, 332 | 0.7 | [33] |
| M8051122 | TS  TS | 304, 310, 383, 384, (307, 323)  305, 384 | 2000  530 | [32]  [29] |  | E104 | TS | 310, 311, 375, 385, 390, 391, 393, (328, 330, 361, 362) | 590 | [33] |
| 9F16 | TS  TS | 304, 383, 384, (310)  305, 384, (307, 327, 329) | 800 | [32]  [29] |  | E105 | TS | 329, 332, 361, 362, (307, 310, 324, 330, 343, 364, 390) | 0.5 | [33] |
| 2Q1899 | TS  TS | 304, 383, 384, (307, 310, 329, 390)  305, 384, (332) | 5000  790 | [32]  [29] |  | E108 | TS | 389, (311, 370) | 70 | [33] |
| 6B6-10 | TS | 304, 329, 330, 331, 384, (303, 310, 327) | 70 | [32] |  | E112 | TS | 390, 391 | 42 | [33] |
| 9A3D-8 | TS | 304, 307, 327 | 30 | [32] |  | DENV2 as immunogen: | | | | |
| 9F11 | TS | 304, 383, 384, (310, 327) | 2000 | [32] |  | DV2-77 | CR | 336, 340, 346, (301, 303) | 200 | [34] |
|  |  |  |  |  |  | DV2-76 | sCR | 305, 307, 309, (310, 327) | 29 | [34] |
|  |  |  |  |  |  | DV2-70 | TS | 305, 307, 309, 327, 389, (303, 330) | 168 | [34] |
|  |  |  |  |  |  | DV2-73 | TS | 336, 340, 346 | 92 | [34] |
|  |  |  |  |  |  | DV2-106 | TS | 305, 307, 327, 330, 389, (303, 309, 311, 359, 367) | 311 | [34] |
|  |  |  |  |  |  | DV2-96 | TS | 305, 307, 309, 389, (303, 327) | 67 | [34] |
|  |  |  |  |  |  | DV2-104 | TS | 336, 340, 346 | 76 | [34] |
|  |  |  |  |  |  | DV2-87 | TS | 336, 340, 346 | 76 | [34] |

* BALB/c mice were immunized with DENV1 [38] or DENV2 [29,30,32,39-42], and subjected to generation of hybridoma and screening.

** IFN-α/β R -/- C57BL/6 micewere infected with DENV1 (16007 strain) or DENV2 (16681 plus NGC strains), reinfected and boosted with

recombinant domain III, and subjected to generation of hybridoma and screening as described previously [33,34].

† GR: flavivirus group-reactive; CR: complex-reactive; sCR: subcomplex-reactive; TS: type-specific.

‡ Epitope residues with severe (reduction ≥ 70% or 80% [32-34] or relative Kd ≥ 10 folds [17] and moderate (50% ≤ reduction < 70% or 80%

[32-34] or 4 folds ≤ relative Kd < 10 folds [29], shown in parenthesis) impairment in binding are shown. Light blue: N-terminus;

pink: A strand; light green: BC loop; red: C strand/CC’ loop; orange: DE loop; green: EF loop/F strand; brown: FG loop; blue: G strand.

§ PRNT50 of DENV1 or DENV2 of the homologous strain [33,34] or of the same genotype [29,32] was shown as ng/ml.
